# Supplementary material
Source: PubMed Central journal article supplement (PMC3547541)

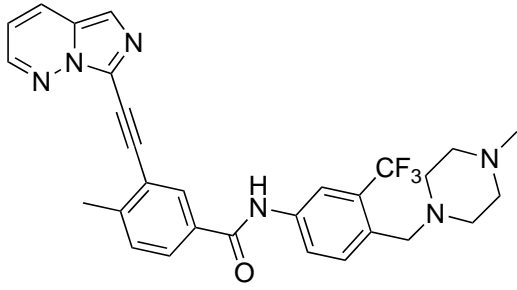

**AP24534**

Supplement: NIHMS417760-supplement-02.pdf [file NIHMS417760-supplement-02.pdf]
